# Supplementary material for: Pre-drawing induced evolution of phase, microstructure and property in para-aramid fibres containing benzimidazole moiety
Source: Royal Society of Chemistry journal article supplement (doi:10.1039/c6ra10184d), 2016-01-01
Supplement: c6ra10184d1.pdf [file c6ra10184d1.pdf]

Pre-drawing induced evolution of phase, microstructure and property in  
para-aramid fibres containing benzimidazole moiety

Longbo Luo Yazhe Wang Jieyang Huang Dawei Hong Xu Wang

Xiangyang Liu\*

State key laboratory of polymer material and engineering, College of  
Polymerscience and engineering, Sichuan University, Chengdu 610065, P.R.China

Corresponding author. Tel.:+86 28 85403948; fax: +86 28 85405138

*E-mail address: lxy6912@sina.com (Xiangyang Liu).*

Two-dimensional Wide angle X-ray diffraction (2D-WAXD) patterns of the fibers were collected on a Bruker D8 Discover with VÅNTEC-500 dectectors with patented Mikrogap. One-dimensional Wide angle X-ray diffraction (1D-WAXD) analysis of PBIA fibers was carried out on a Philips X'Pert PRO MPD. X-ray diffraction measurements were taken from the reflection mode at room temperature, using Ni-filtered Cu K $\alpha$  radiation operated at 40 KV X 40 mA.

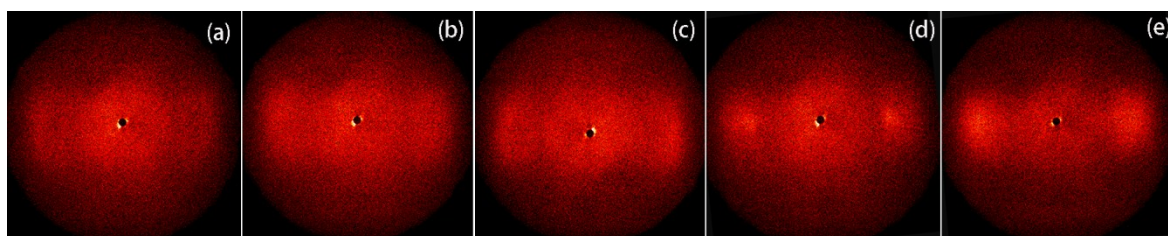

Figure S1 The 2D-WAXD patterns of as-spun fibers: (a) PBIA-0; (b) PBIA-25; (c) PBIA-50; (d) PBIA-75; (e) PBIA-100.

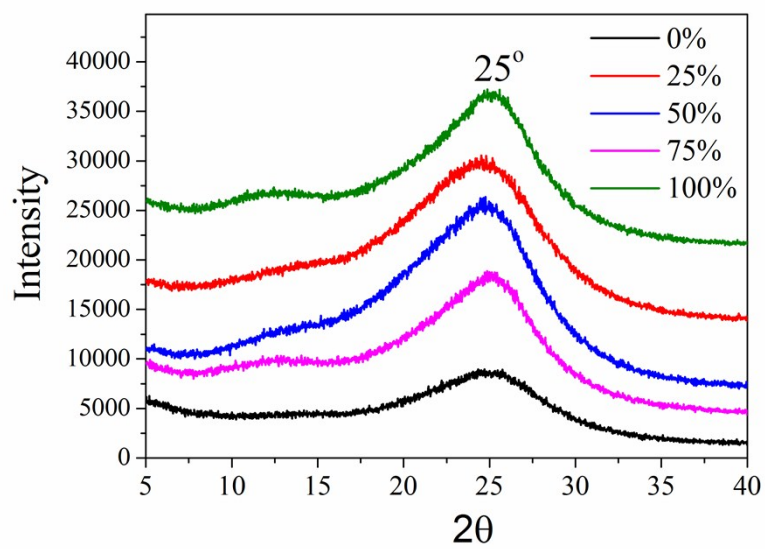

Figure S2 The WAXD curves of as-spun fibers
